# Supplementary material for: Skeletal muscle transcriptomics identifies common pathways in nerve crush injury and ageing
Source: PubMed Central journal article supplement (PMC8800362; doi:10.1186/s13395-021-00283-4), 2022-01-29
Supplement: 13395_2021_283_MOESM1_ESM.pdf [file 13395_2021_283_MOESM1_ESM.pdf]

**Supplementary table 1: Common DEG between Adult and Old mice using the SarcoAtlas platform. The 28 genes listed below are common between the adult (6month) and old (26month old) data produced from this study and from the SarcoAtlas - 'Aging-CR-RM' control mice data base (GEO accession number: GSE139204).**

| Ensembl gene ID    | Gene name     | FDR         | log2 Fold Change |
|--------------------|---------------|-------------|------------------|
| ENSMUSG00000036046 | 5031439G07Rik | 0.026603381 | 0.748101918      |
| ENSMUSG00000074264 | Amy1          | 0.037774657 | -1.307878632     |
| ENSMUSG00000041460 | Cacna2d4      | 0.024393981 | 1.686974117      |
| ENSMUSG00000020722 | Cacng1        | 0.005390966 | -1.213623985     |
| ENSMUSG00000048701 | Ccdc6         | 0.044572598 | 0.891253522      |
| ENSMUSG00000039084 | Chad          | 0.010575832 | 3.311390977      |
| ENSMUSG00000029661 | Col1a2        | 0.024393981 | 1.802937022      |
| ENSMUSG00000026837 | Col5a1        | 0.028210175 | 1.595960771      |
| ENSMUSG00000025366 | Esyt1         | 0.005446908 | 0.893483419      |
| ENSMUSG00000022200 | Golph3        | 0.043901614 | 1.129390081      |
| ENSMUSG00000027346 | Gpcpd1        | 0.001887492 | 1.183694444      |
| ENSMUSG00000015656 | Hspa8         | 0.024954623 | 1.228141897      |
| ENSMUSG00000024210 | Ip6k3         | 0.024393981 | 1.271108083      |
| ENSMUSG00000031740 | Mmp2          | 0.042441263 | 1.79621396       |
| ENSMUSG00000019933 | Mrln          | 0.036039132 | -1.103714284     |
| ENSMUSG00000014776 | Nol3          | 0.025944996 | -1.323974165     |
| ENSMUSG00000019916 | P4ha1         | 0.001634674 | 1.414809161      |
| ENSMUSG00000021143 | Pacs2         | 0.042534808 | 1.016588496      |
| ENSMUSG00000021140 | Pcnx          | 0.035423763 | 1.41187465       |
| ENSMUSG00000028273 | Pdim5         | 0.033718065 | 1.05752822       |
| ENSMUSG00000024145 | Pigf          | 0.021173193 | 2.107970385      |
| ENSMUSG00000022216 | Psme1         | 0.024393981 | -0.809860243     |
| ENSMUSG00000020460 | Rps27a        | 0.024954623 | -0.963295973     |
| ENSMUSG00000022462 | Slc38a2       | 0.039451538 | 1.565301937      |
| ENSMUSG00000063919 | Srrm4         | 0.0000286   | -2.235730788     |
| ENSMUSG00000021702 | Thbs4         | 0.018458307 | 1.269035079      |
| ENSMUSG00000032501 | Trib1         | 0.025742679 | 1.21045814       |
| ENSMUSG00000036769 | Wdr44         | 0.036941415 | 1.90061141       |
